# Supplementary material for: Injectable and pH-responsive self-assembled peptide hydrogel for promoted tumor cell uptake and enhanced cancer chemotherapy
Source: Royal Society of Chemistry journal article supplement (doi:10.1039/d1bm01788h), 2022-01-01
Supplement: d1bm01788h1.pdf [file d1bm01788h1.pdf]

**Injectable and pH-responsive self-assembly peptide hydrogel for promoted tumor cell uptake and enhanced cancer chemotherapy**

Jiamin Zhang<sup>1</sup>, Wenjing Lin<sup>1</sup>, Lijun Yang, Aijie Zhang, Yumin Zhang\*, Jinjian Liu\*, Jianfeng Liu\*

Key Laboratory of Radiopharmacokinetics for Innovative Drugs, Chinese Academy of Medical Sciences, and Institute of Radiation Medicine, Chinese Academy of Medical Sciences & Peking Union Medical College, Tianjin

\*Corresponding author:

Dr. Yumin Zhang, E-mail: zhangyumin@irm-cams.ac.cn;

Dr. Jinjian Liu, E-mail: liujinjian@irm-cams.ac.cn;

Prof. Jianfeng Liu, E-mail: liujianfeng@irm-cams.ac.cn

## Supplementary Figures

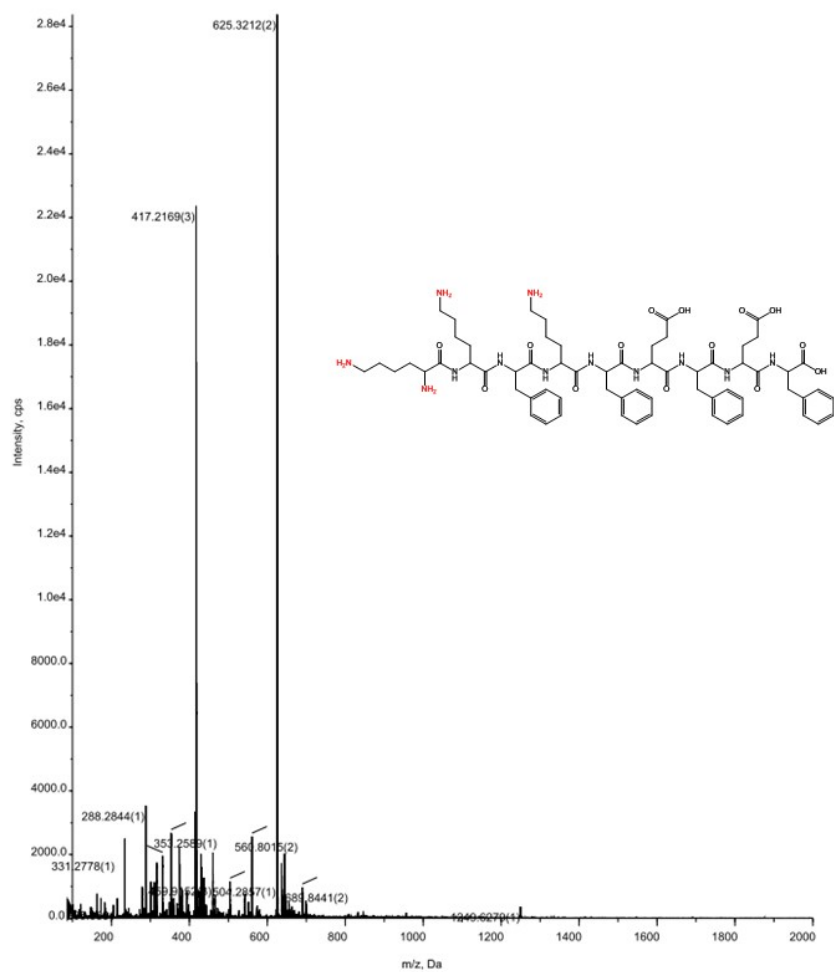

Figure S1. The LC-MS of KKFKFEF peptide

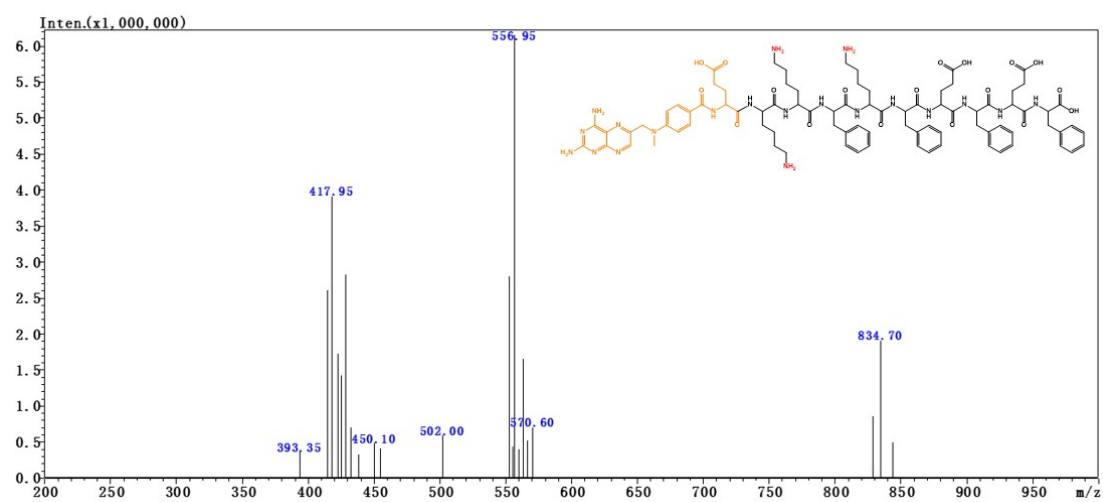

Figure S2. The high-resolution mass spectrometry of MTX-KKFKFEF peptide

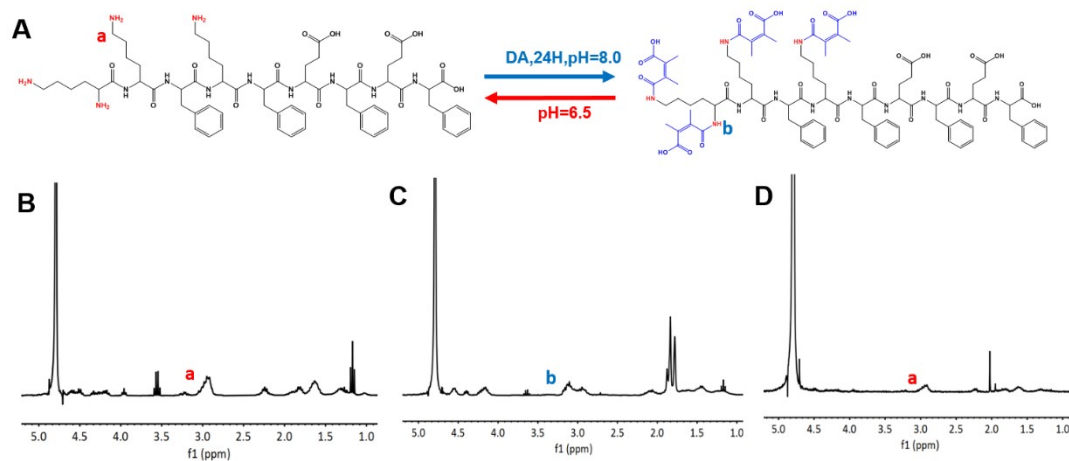

Figure S3. (A) The synthetic process of DA conjugated KKFKFEFEEF peptide. (B-D) <sup>1</sup>H NMR results of (B) KKFKFEFEEF peptide, (C) DA conjugated KKFKFEFEEF peptide and (D) the DA conjugated KKFKFEFEEF peptide after being incubated with TFA at pH 6.5.

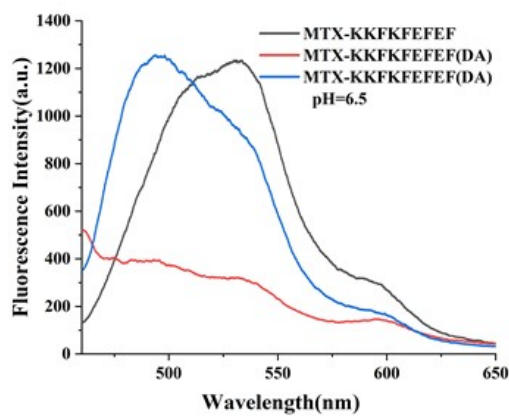

Figure S4. ThT assay of different MTX conjugated peptides. The fluorescence measurements were performed at ex. 450 nm and em. 485 nm.

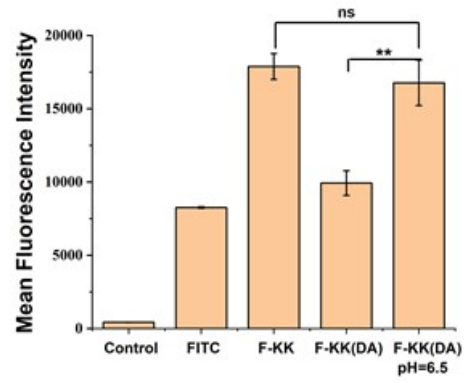

Figure S5. The relevant fluorescence intensity of cells incubated with different FITC-labelled peptides after 2 h incubation.

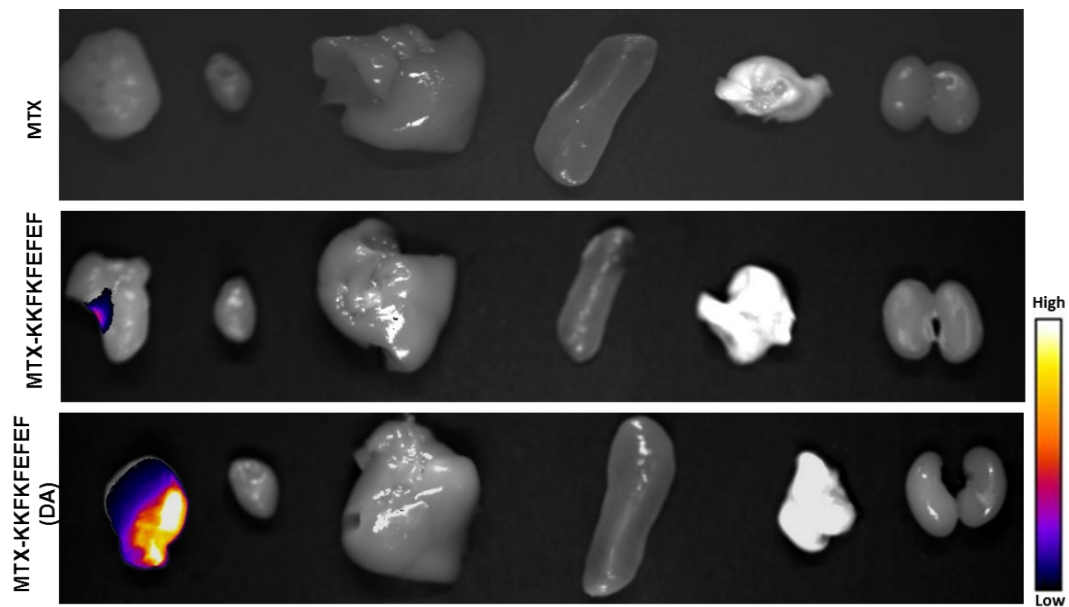

Figure S6. *In vitro* bioluminescent images of major organs and tumor after 72 h injection.

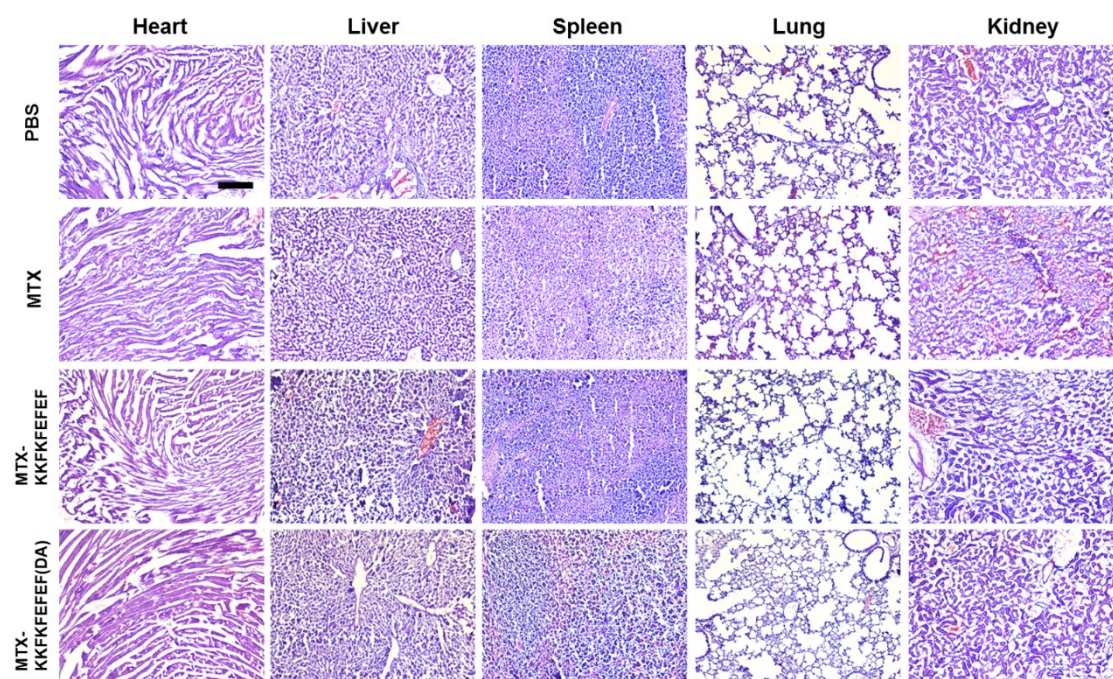

Figure S7. *In vivo* biosafety of the MTX-peptide hydrogel after 21 days treatment. H&E images of the main organs including heart, liver, spleen, lung, and kidney of 4T1-tumor-bearing BALB/c mice. Scale bar = 100 μm.

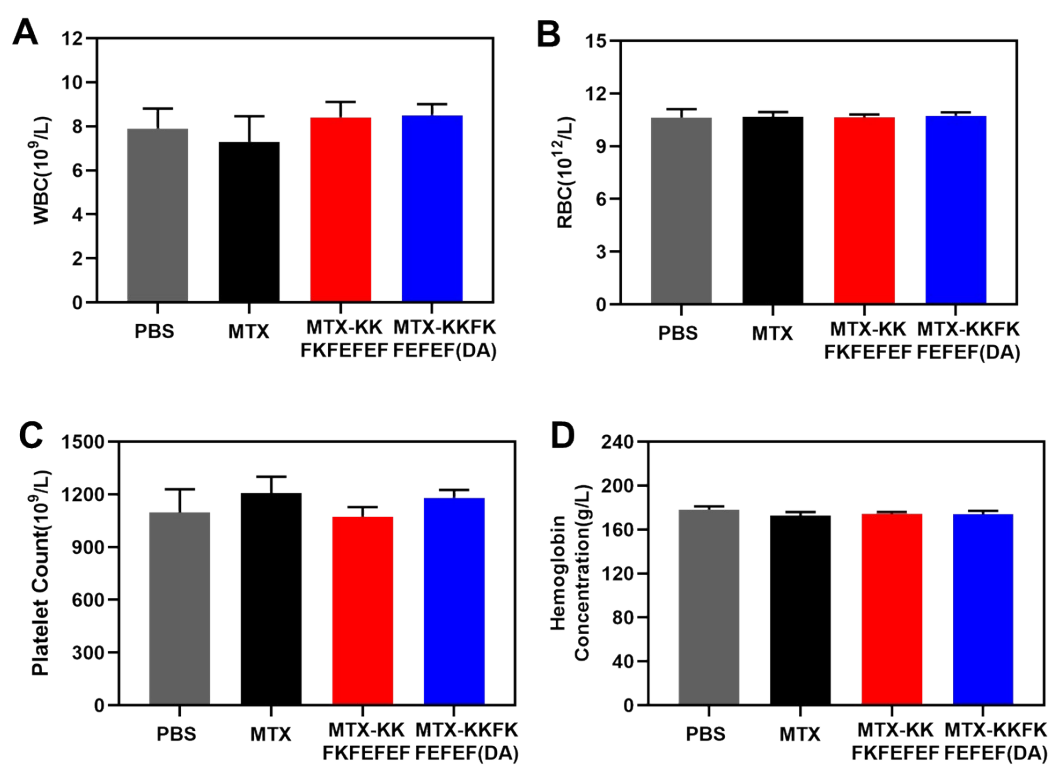

Figure S8. Hematology analysis of mice treated with different drug-peptide samples, (A) WBC, (B)

RBC, (C) platelet and (D) hemoglobin.

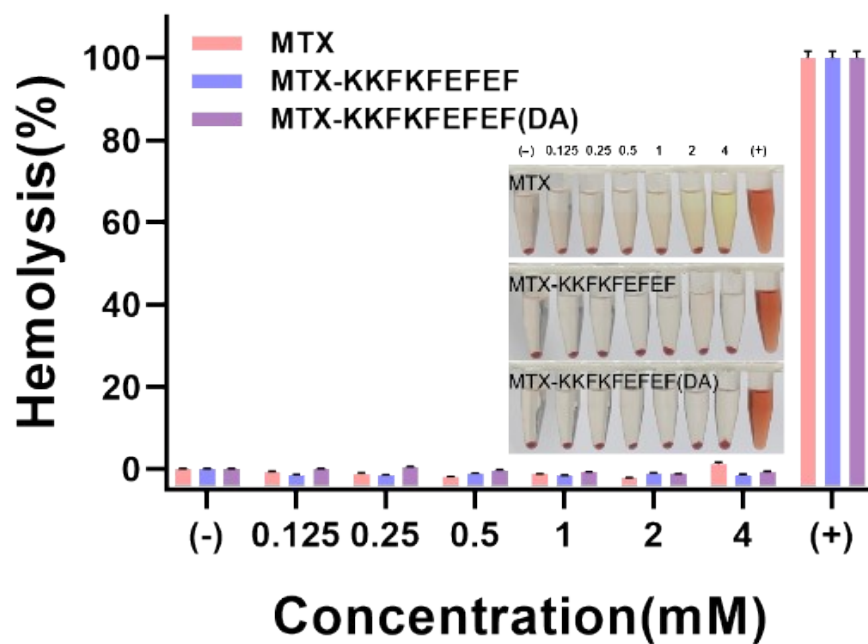

Figure S9. Hemolysis analysis of MTX, MTX-KKFKFEFEEF and MTX-KKFKFEFEEF(DA) at predetermined concentrations. Red blood cells incubated with PBS and 0.1% Triton X-100 (diluted with PBS) were used as negative (-) and positive (+) control, respectively. The data are shown as mean  $\pm$  SD (n = 3).
